# Supplementary material for: Over 800% efficiency enhancement of all-inorganic quantum-dot light emitting diodes with an ultrathin alumina passivating layer
Source: Royal Society of Chemistry journal article supplement (doi:10.1039/c8nr01460d), 2018-01-01
Supplement: c8nr01460d1.pdf [file c8nr01460d1.pdf]

# Supporting Information for

## Over 800% efficiency enhancement of all-inorganic quantum-dot light emitting diodes with an ultrathin alumina passivating layer

Wenyu Ji,<sup>a\*</sup> Huaibin Shen,<sup>b\*</sup> Han Zhang,<sup>a</sup> Zhihui Kang,<sup>a</sup> Hanzhuang Zhang<sup>a\*</sup>

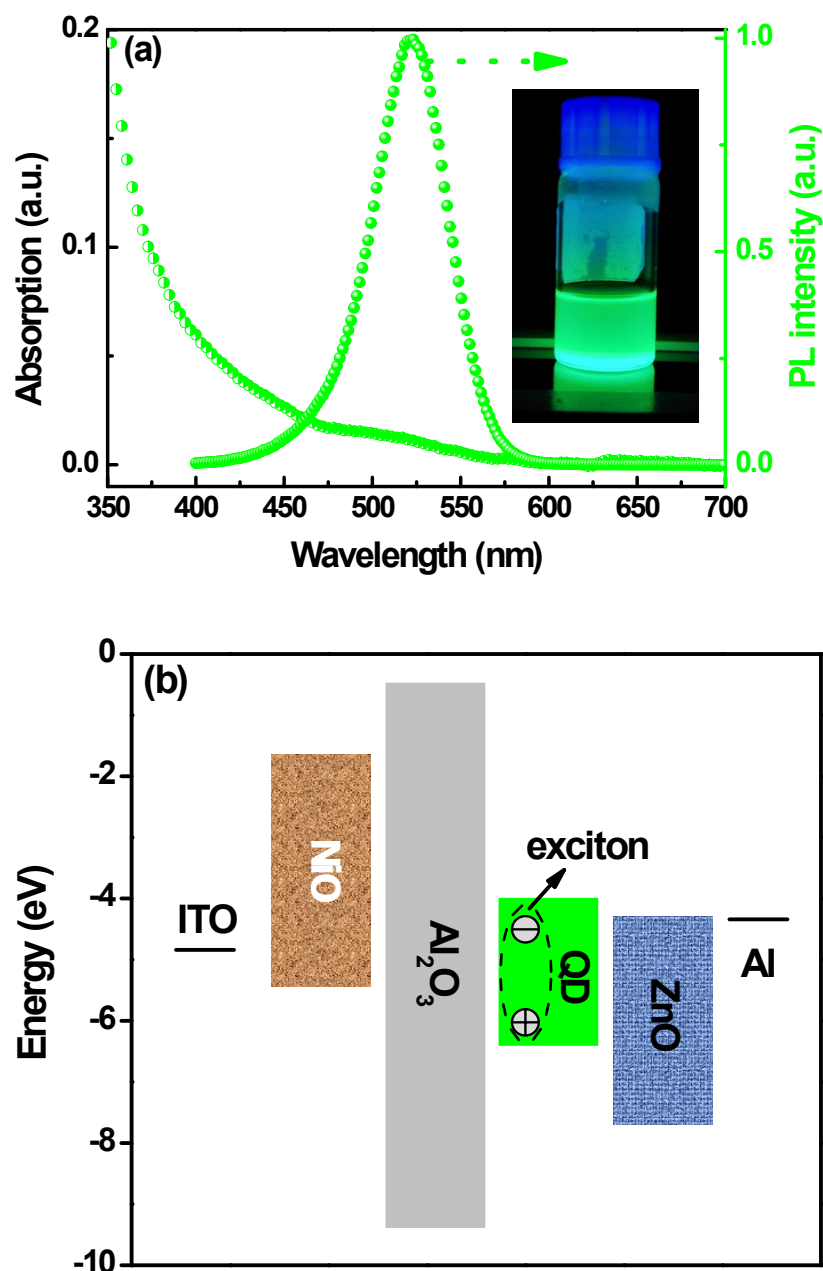

**Figure S1.** (a) PL and absorption spectra of QDs in toluene. (b) Schematic diagram of energy-level alignment properties for the all inorganic QLED.

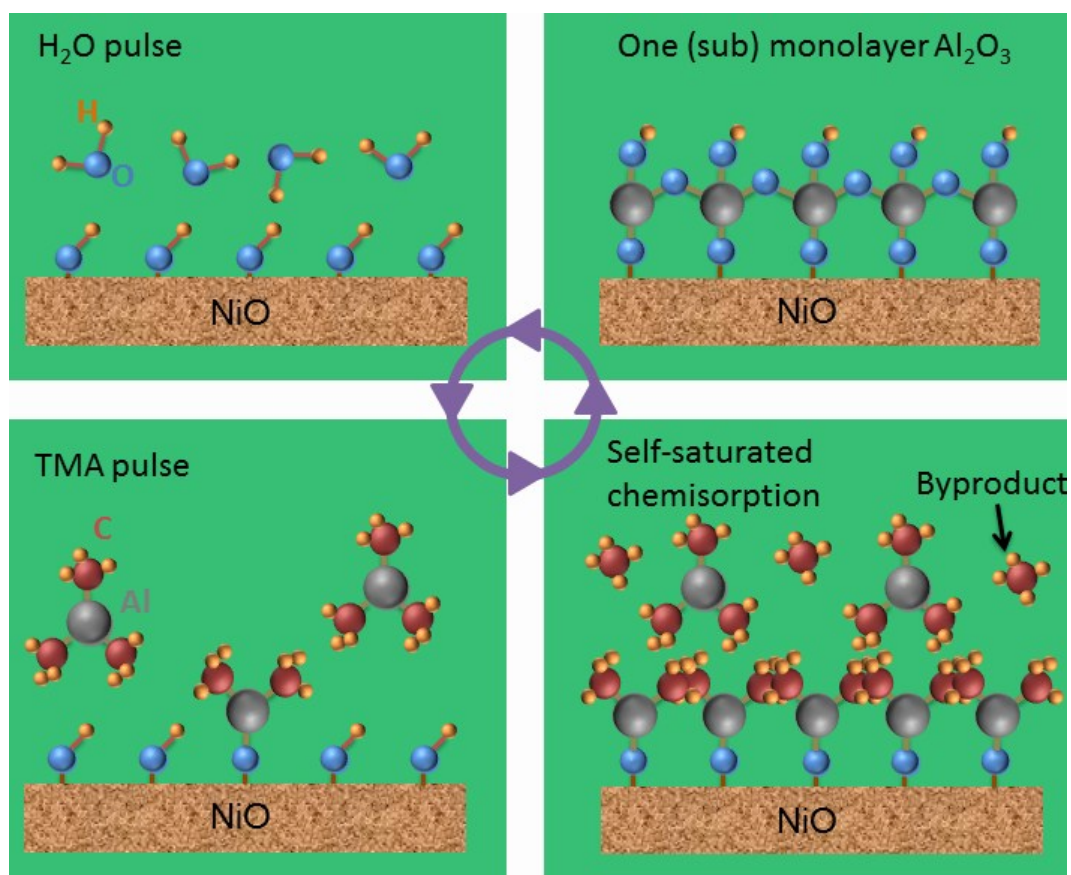

**Figure S2 (a)** Schematic diagram of ALD processes for the  $\text{Al}_2\text{O}_3$ .

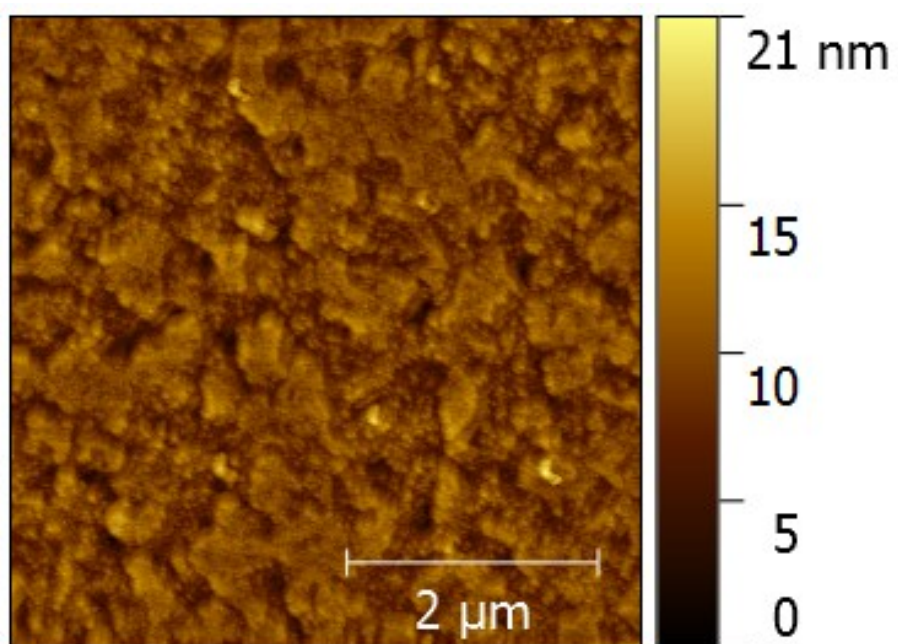

**Figure S3** AFM image of pure ITO substrate. The RMS is 1.92 nm.

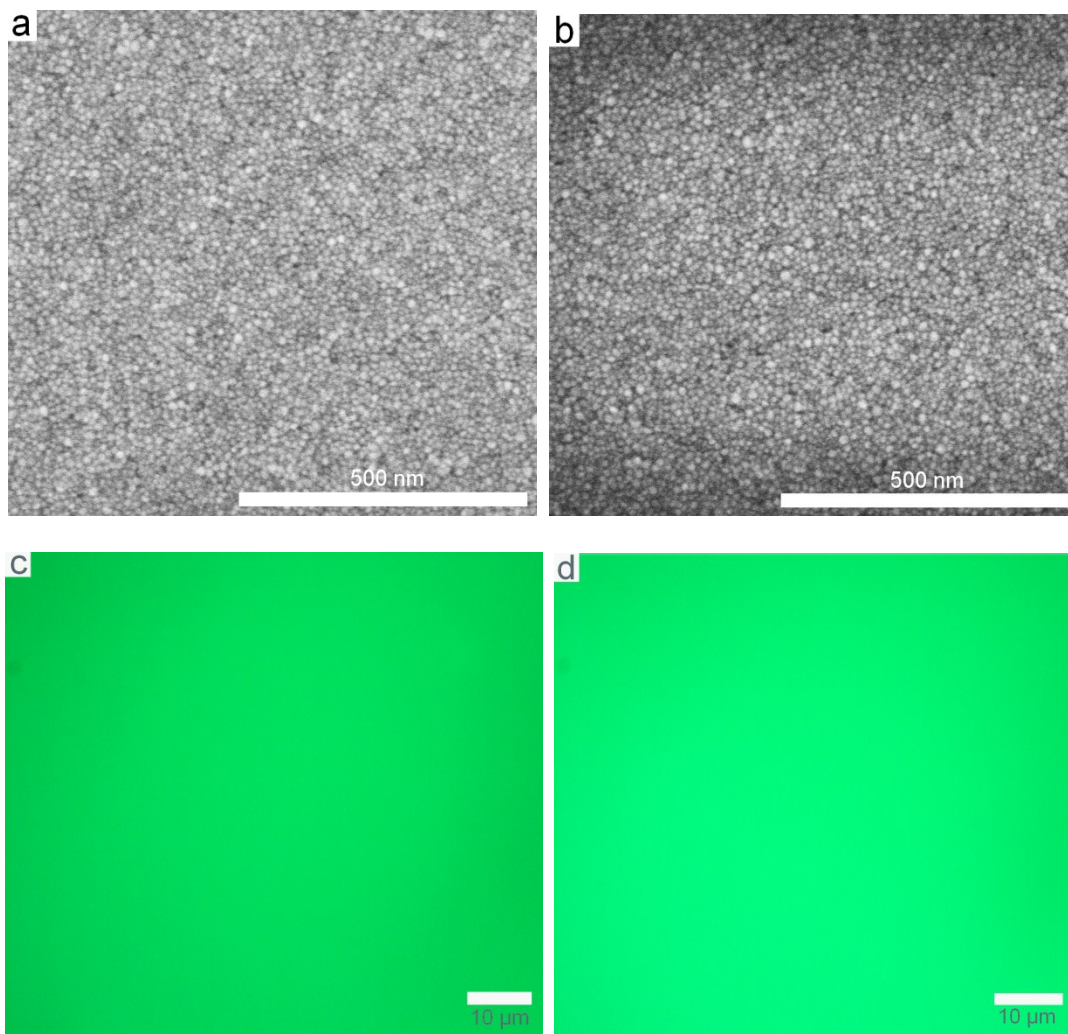

**Figure S4.** SEM images of QD films on (a) s-NiO and (b) s-NiO/Al<sub>2</sub>O<sub>3</sub> layers; Fluorescent microscope images of QDs deposited on (c) s-NiO and (d) s-NiO/Al<sub>2</sub>O<sub>3</sub> layers.

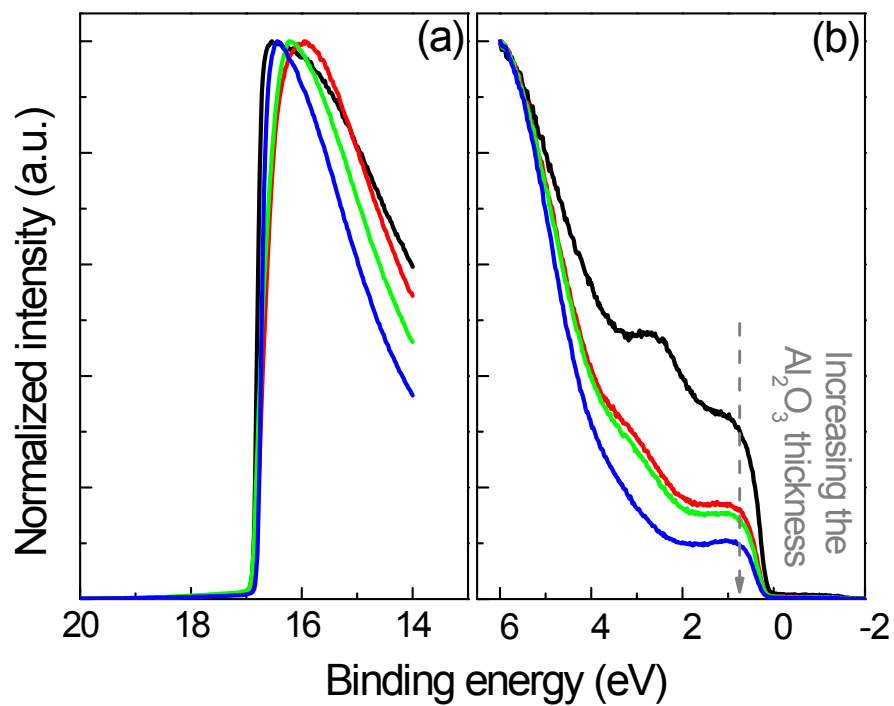

**Figure S5.** He I  $h\nu = 21.22$  eV valence band spectra of NiO with different thickness  $\text{Al}_2\text{O}_3$  passivating layers (a) the secondary electron cut-off and (b) the valence band.

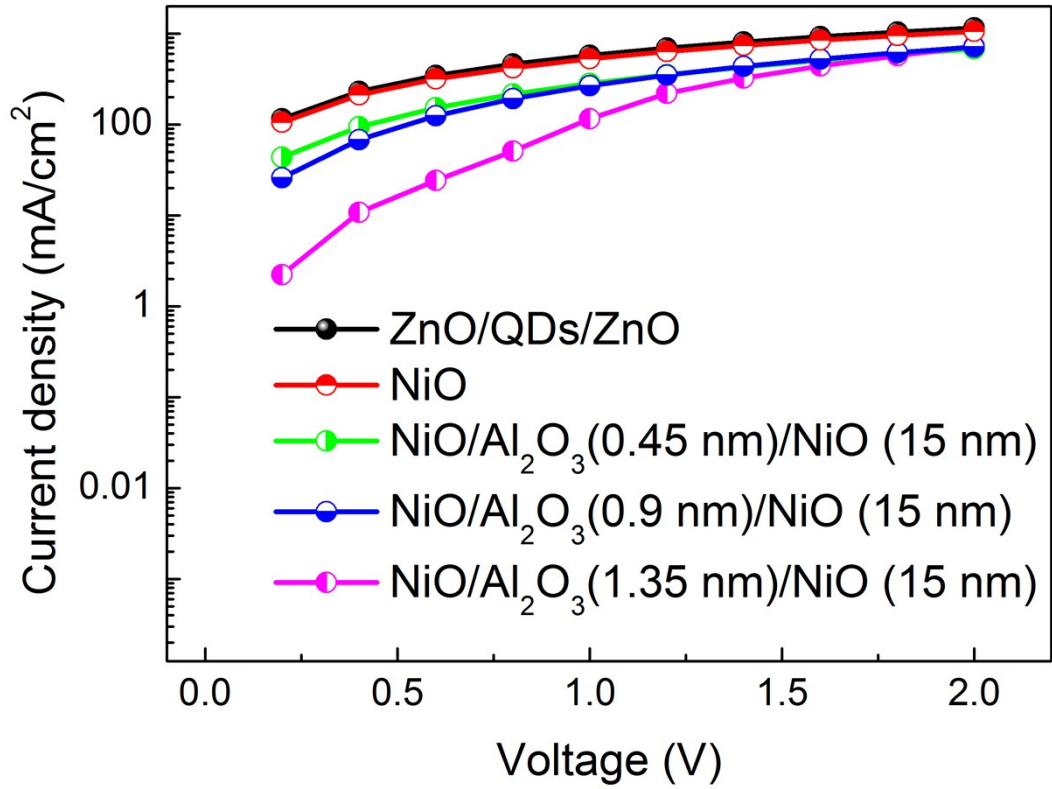

**Figure S6** Current-voltage characteristics of electron (hole)-only devices. The electron-only device possesses a structure of ITO/ZnO (15 nm)/QDs (25 nm)/ZnO (40 nm)/Al (100 nm). The 15-nm ZnO on the ITO substrate is used as the hole blocking layer in order to limit the hole injection from ITO into the device. The hole-only devices consist of ITO/NiO (50 nm)/Al<sub>2</sub>O<sub>3</sub> (*x* nm)/NiO (15 nm)/Al (100 nm). The value of *x* is 0, 0.45, 0.9, and 1.35 nm as depicted in the figure.

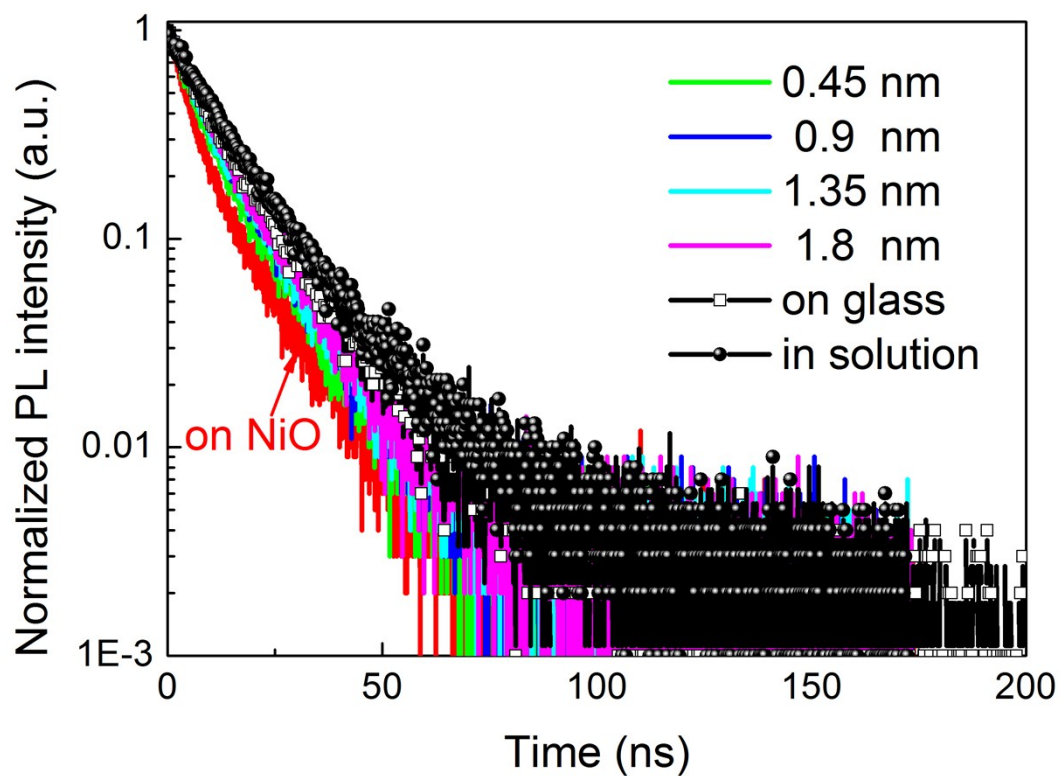

**Figure S7 (a)** Time-resolved PL spectra of QD layers on s-NiO substrates differentiated by inserted different cycle  $\text{Al}_2\text{O}_3$  layers, from 0 to 1.35 nm for different samples. The TRPL spectra of QDs in toluene and on glass substrate are also shown as the reference.
